# Supplementary material for: π-Plasmon absorption of carbon nanotubes for the selective and sensitive detection of Fe3+ ions
Source: Royal Society of Chemistry journal article supplement (doi:10.1039/c6sc00006a), 2016-01-01
Supplement: c6sc00006a1.pdf [file c6sc00006a1.pdf]

## Supplementary Information

### $\pi$ -Plasmon of Carbon Nanotubes for Selective and Sensitive Detection of $\text{Fe}^{3+}$ Ions

William Cheun,<sup>a†</sup> Mehulkumar Patel,<sup>a†</sup> Yufeng Ma,<sup>a</sup> Yuan Chen,<sup>a</sup> Qiaoqiao Xie,<sup>a</sup> Jenny Lockard,<sup>a</sup> Yuan Gao<sup>b</sup> and Huixin He<sup>a\*</sup>

<sup>a</sup>Department of Chemistry, Rutgers University, 73 Warren Street, Newark, New Jersey 07102, United States.

<sup>b</sup>Department of Earth & Environmental Sciences, Rutgers University, 101 Warren Street, Newark, New Jersey 07102, United States.

\*Corresponding Author: Dr. Huixin He, Email: huixinhe@rutgers.edu, Phone: +1-973-353-1254, Fax: +1-973-353-1264

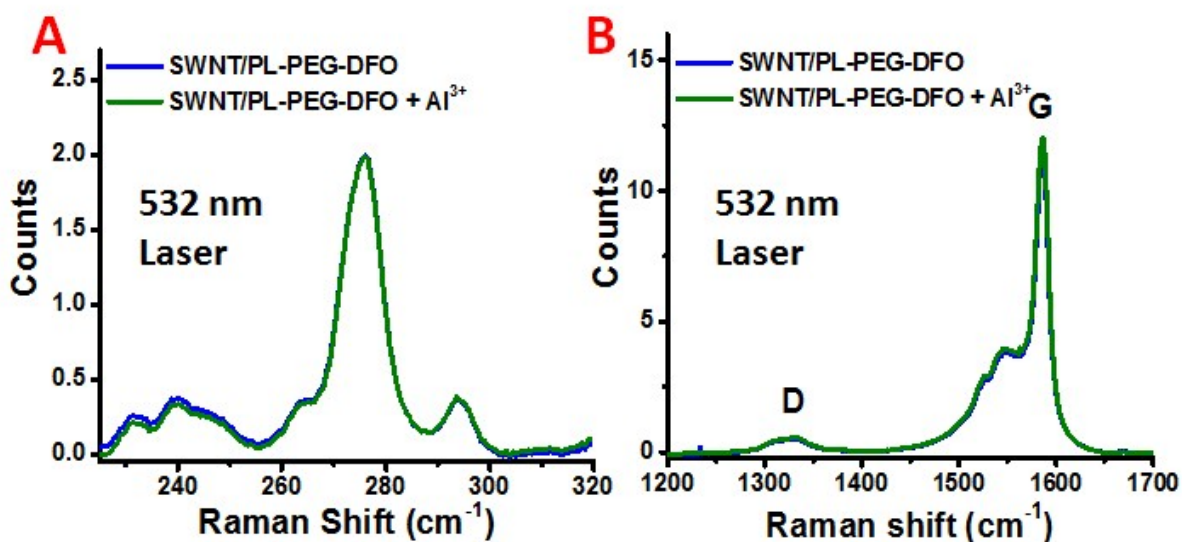

**Figure S1.** Raman spectroscopy of SWNT/PL-PEG-DFO solution, before and after addition of  $\text{Al}^{3+}$  using 532 nm laser (A and B).

#### Proposed Mechanism:

For semiconductor tubes, the intensities of all the Raman peaks decreased slightly upon addition of  $\text{Al}^{3+}$  into the SWNT/PL-PEG-DFO solution. Similar to the case of  $\text{Fe}^{3+}$ , no peak shift was observed (Figure 3C and 3D). Since electron transferring is the only possible mechanism for

the observed absorption quenching upon  $\text{Al}^{3+}$ -DFO complex formation on the tubes, we tended to conclude that electron transferring was also the possible mechanism for the case of  $\text{Fe}^{3+}$ . For metallic tubes, similar intensity decrease or peak shift was expected based on the electron transferring mechanism. However, we barely distinguished any change in the Raman spectra of SWNT/PL-PEG-DFO solution before and after addition of  $\text{Al}^{3+}$  solution. This is very different from obvious peak shifts upon  $\text{Fe}^{3+}$ -DFO formation. These facts made us question the previous conclusion for the semiconductor tubes. Future work is still needed to understand the true mechanism of the observed absorption decrease for the semiconducting tubes.
